# Supplementary material
Source: PubMed Central journal article supplement (PMC6504600)
Supplement: NIHMS1515891-supplement-1.pdf [file NIHMS1515891-supplement-1.pdf]

Control Level 2

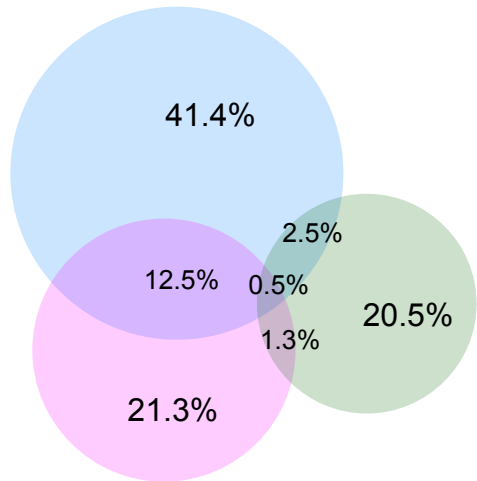

Control Level 3

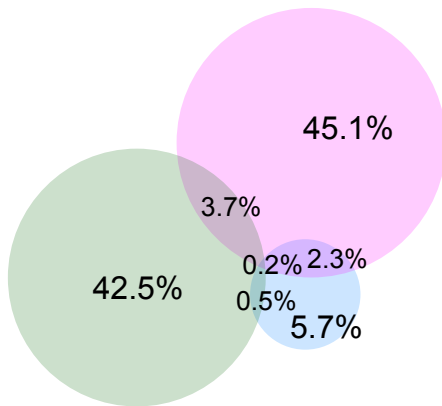

Control Level 4

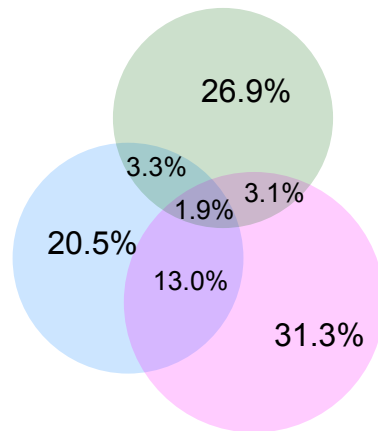

Day Symptoms  
Night Symptoms  
Pulmonary Function

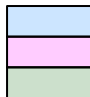

Day Symptoms  
Night Symptoms  
Pulmonary Function

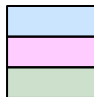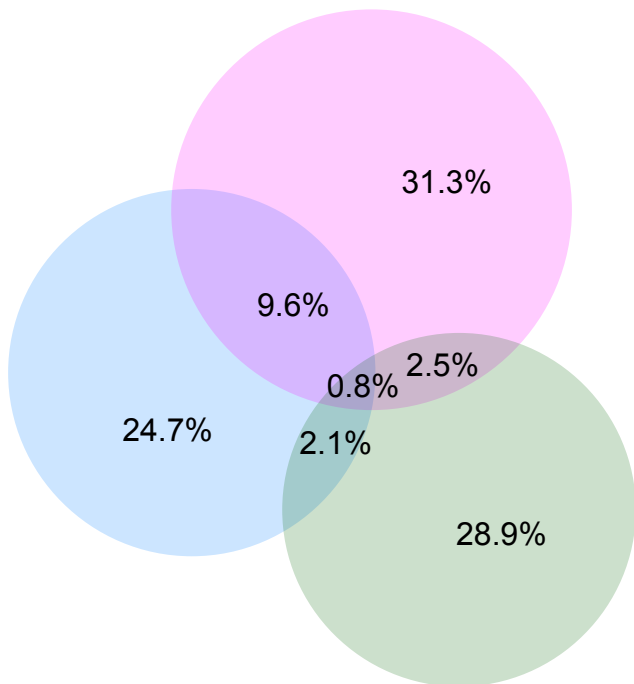

Table E1 - Characteristics of Study Participants at Screening Visit from Three ICAC Clinical Trials

| Characteristic                                              | ACE<br>(n=546) | ICATA<br>(n=419) | PROSE<br>(n=478) | p-value |
|-------------------------------------------------------------|----------------|------------------|------------------|---------|
| Age - yr.                                                   | 14 [13-16]     | 10 [8-14]        | 9 [7-11]         | <0.001  |
| Male sex                                                    | 288 (52.7%)    | 242 (57.8%)      | 303 (63.4%)      | 0.003   |
| Race or ethnic group                                        |                |                  |                  | <0.001  |
| Black                                                       | 347 (63.6%)    | 252 (60.1%)      | 279 (58.4%)      |         |
| Hispanic                                                    | 125 (22.9%)    | 155 (37.0%)      | 161 (33.7%)      |         |
| Other or mixed                                              | 74 (13.6%)     | 12 (2.9%)        | 38 (8.0%)        |         |
| Caretaker completed high school                             | 358 (76.5%)    | 303 (74.1%)      | 340 (71.3%)      | 0.19    |
| ≥ household member employed                                 | 450 (82.4%)    | 302 (72.1%)      | 330 (69.0%)      | <0.001  |
| Annual household income < \$15,000                          | 262 (52.2%)    | 224 (53.7%)      | 262 (55.4%)      | 0.61    |
| Duration of asthma – yr.                                    | 10.1 (4.3)     | 6.8 (3.9)        | 6.9 (3.5)        | <0.001  |
| Total Serum IgE                                             | 262 [100-658]  | 240 [118-424]    | 254 [128-462]    | 0.10    |
| Total # Positive Aeroallergen Skin Tests                    | 5.0 [2.0-7.0]  | 5.00 [3.0-7.0]   | 4.0 [3.0-6.0]    | <0.001  |
| Asthma Control                                              |                |                  |                  |         |
| C-ACT score, previous month, age 4-11 yr.                   | N/A            | 18.9 (4.07)      | 18.9 (4.10)      | 0.87    |
| ACT score, previous month, age ≥ 12 yr.                     | 18.2 (4.19)    | 18.8 (4.22)      | 19.1 (4.10)      | 0.04    |
| Asthma-related symptoms –days/2 weeks                       |                |                  |                  |         |
| Wheezing                                                    | 4.5 (4.13)     | 4.0 (3.91)       | 3.6 (3.88)       | 0.001   |
| Interference with activity                                  | 3.3 (4.09)     | 2.7 (3.35)       | 2.6 (3.59)       | 0.002   |
| Nighttime sleep disruption                                  | 2.7 (3.69)     | 2.1 (3.14)       | 1.9 (3.08)       | <0.001  |
| Lung function                                               |                |                  |                  |         |
| FEV <sub>1</sub> - % predicted value                        | 92.1 (16.6)    | 92.1 (17.1)      | 90.5 (17.2)      | 0.23    |
| FEV <sub>1</sub> : FVC x 100                                | 77.8 (9.42)    | 77.0 (9.90)      | 77.4 (10.2)      | 0.46    |
| Asthma healthcare use in 6 mo. prior to enrollment*         |                |                  |                  |         |
| ≥ 1 hospitalization (participant or parent self-reported)   | 80 (14.7%)     | 104 (24.8%)      | 96 (20.1%)       | <0.001  |
| ≥ 1 unscheduled visit (participant or parent self-reported) | 375 (68.7%)    | 328 (78.3%)      |                  | 0.001   |

Values are mean (standard deviation), median [interquartile range] or number (percent)

N/A (Not Applicable)

\* In PROSE hospitalizations were collected with a 1-year look back; unscheduled visits were not collected.

**Table E2** – (A) Asthma control level and (B) treatment steps by Clinical Trial by Visit

| (A)   | Control Level | Screening   | Randomization | 1st post*   | End of study * |
|-------|---------------|-------------|---------------|-------------|----------------|
| ACE   | 1             | 124 (22.7%) | 385 (70.5%)   | 193 (73.9%) | 177 (72.8%)    |
|       | 2             | 109 (20.0%) | 93 (17.0%)    | 37 (14.2%)  | 29 (11.9%)     |
|       | 3             | 125 (22.9%) | 36 (6.6%)     | 18 (6.9%)   | 22 (9.1%)      |
|       | 4             | 188 (34.4%) | 32 (5.9%)     | 13 (5.0%)   | 15 (6.2%)      |
|       | N             | 546         | 546           | 261         | 243            |
|       | Mean (SD)     | 2.7 (1.2)   | 1.5 (0.9)     | 1.4 (0.8)   | 1.5 (0.9)      |
| ICATA | 1             | 116 (27.7%) | 214 (51.1%)   | 88 (48.4%)  | 106 (62.7%)    |
|       | 2             | 76 (18.1%)  | 97 (23.2%)    | 35 (19.2%)  | 33 (19.5%)     |
|       | 3             | 100 (23.9%) | 52 (12.4%)    | 33 (18.1%)  | 17 (10.1%)     |
|       | 4             | 127 (30.3%) | 56 (13.4%)    | 26 (14.3%)  | 13 (7.7%)      |
|       | N             | 419         | 419           | 182         | 169            |
|       | Mean (SD)     | 2.6 (1.2)   | 1.9 (1.1)     | 2.0 (1.1)   | 1.6 (0.9)      |
| PROSE | 1             | 68 (13.3%)  | 265 (51.7%)   |             |                |
|       | 2             | 162 (31.6%) | 133 (25.9%)   |             |                |
|       | 3             | 133 (25.9%) | 67 (13.1%)    |             |                |
|       | 4             | 150 (29.2%) | 48 (9.4%)     |             |                |
|       | N             | 513         | 513           |             |                |
|       | Mean (SD)     | 2.7 (1.0)   | 1.8 (1.0)     |             |                |

\* Usual care only for the double-blind phase.

| (B)   | Treatment Step | Screening   | Randomization | 1st post*  | End of study* |
|-------|----------------|-------------|---------------|------------|---------------|
| ACE   | 0              |             | 4 (0.7%)      | 23 (8.8%)  | 43 (17.7%)    |
|       | 1              | 86 (15.8%)  | 58 (10.6%)    | 25 (9.6%)  | 28 (11.5%)    |
|       | 2              | 100 (18.3%) | 101 (18.5%)   | 34 (13.0%) | 36 (14.8%)    |
|       | 3              | 74 (13.6%)  | 78 (14.3%)    | 33 (12.6%) | 40 (16.5%)    |
|       | 4              | 101 (18.5%) | 76 (13.9%)    | 45 (17.2%) | 20 (8.2%)     |
|       | 5              | 105 (19.2%) | 95 (17.4%)    | 45 (17.2%) | 20 (8.2%)     |
|       | 6              | 80 (14.7%)  | 134 (24.5%)   | 56 (21.5%) | 56 (23%)      |
|       | N              | 546         | 546           | 261        | 243           |
|       | Mean (SD)      | 3.5 (1.7)   | 3.8 (1.8)     | 3.6 (1.9)  | 3.0 (2.2)     |
| ICATA | 0              |             |               |            | 22 (13.0%)    |
|       | 1              | 49 (11.7%)  | 44 (10.5%)    | 22 (12.2%) | 20 (11.8%)    |
|       | 2              | 61 (14.6%)  | 69 (16.5%)    | 30 (16.6%) | 22 (13.0%)    |
|       | 3              | 90 (21.5%)  | 80 (19.1%)    | 30 (16.6%) | 25 (14.8%)    |
|       | 4              | 87 (20.8%)  | 72 (17.2%)    | 33 (18.2%) | 25 (14.8%)    |
|       | 5              | 54 (12.9%)  | 83 (19.8%)    | 27 (14.9%) | 28 (16.6%)    |
|       | 6              | 78 (18.6%)  | 71 (16.9%)    | 39 (21.5%) | 27 (16.0%)    |
|       | N              | 419         | 419           | 182        | 169           |
|       | Mean (SD)      | 3.6 (1.6)   | 3.7 (1.6)     | 3.7 (1.7)  | 3.2 (2.0)     |
| PROSE | 0              |             |               |            |               |
|       | 1              |             |               |            |               |
|       | 2              | 167 (32.6%) | 105 (20.5%)   |            |               |
|       | 3              | 120 (23.4%) | 101 (19.7%)   |            |               |
|       | 4              | 110 (21.4%) | 112 (21.8%)   |            |               |
|       | 5              | 116 (22.6%) | 195 (38%)     |            |               |
|       | 6              |             |               |            |               |
|       | N              | 513         | 513           |            |               |
|       | Mean (SD)      | 3.3 (1.2)   | 3.8 (1.2)     |            |               |

\* Placebos only for the double-blind phase.

**Supplemental material figure legends**

Figure E1 - Venn diagrams displaying contribution of each ACET impairment domain measurement from all included study visits to control levels 2-4 for each clinical trial. Numerals are numbers of times measure contributed to control.

Figure E2 - Venn diagrams displaying contribution of each ACET impairment domain measurement from all included study visits by control level for all three ICAC trials combined. Numerals are numbers of times measure contributed to control level.
